# Supplementary material
Source: PubMed Central journal article supplement (PMC11548942)
Supplement: NIHMS2031512-supplement-1.pdf [file NIHMS2031512-supplement-1.pdf]

**Supplementary Table 1. Locomotor data by group and compartment.**

|                   | <b>White compartment<br/>Mean (cm) ± SEM</b> | <b>Black compartment<br/>Mean (cm) ± SEM</b> |
|-------------------|----------------------------------------------|----------------------------------------------|
| <b>Male Sal</b>   | 2669 ± 367                                   | 3119 ± 424                                   |
| <b>Male Oxy</b>   | 2798 ± 311                                   | 3824 ± 931                                   |
| <b>Female Sal</b> | 2673 ± 366                                   | 3182 ± 565                                   |
| <b>Female Oxy</b> | 3505 ± 712                                   | 2557 ± 496                                   |

Oxy-treated animals received saline in the white compartment every other day and oxycodone in the black compartment every other day. Saline-treated animals received saline in both compartments. N =6 rats/group

**Supplementary Table 1.** Locomotion scores for female and male rats for the oxycodone injection days during the 4 conditioning sessions. Repeated measures ANOVA showed no significant differences in locomotor scores in any of the training sessions. However, locomotor scores were not collected for half of the rats in each session due to a technical error with the behavioral software.
